# Supplementary figures and images for: Early life imprints the hierarchy of T cell clone sizes
Source: eLife journal article supplement (doi:10.7554/elife.61639), 2020-12-21

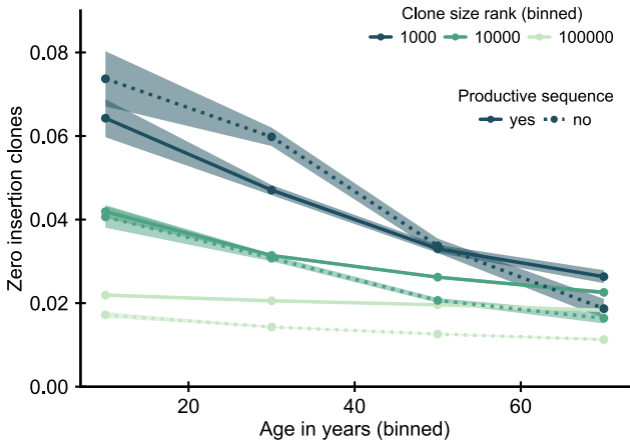

Supplement: supp [file elife-61639-supp-v1.zip]

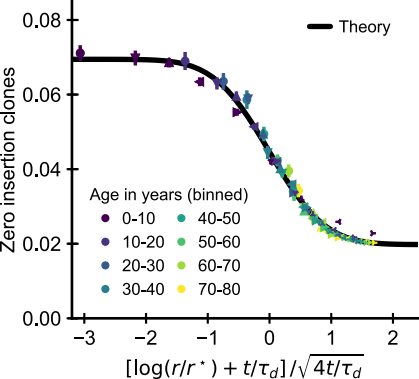

Supplement: supp [file elife-61639-supp-v1.zip]

Subject 1

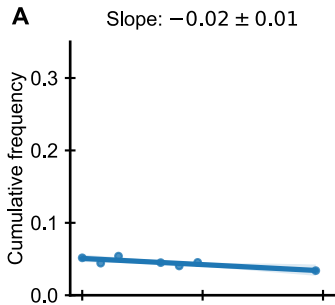

Subject 2

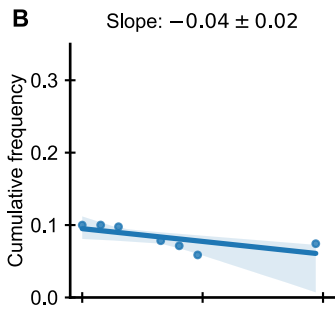

Subject 3

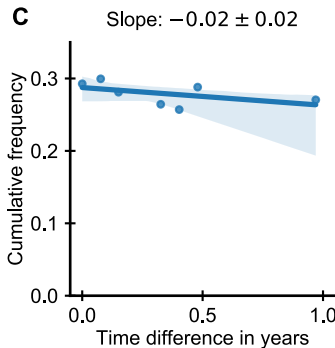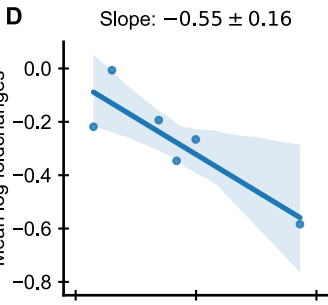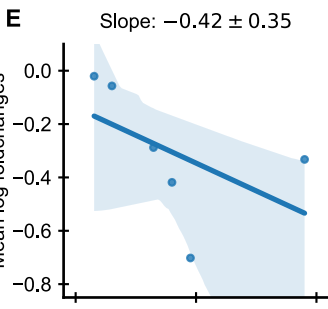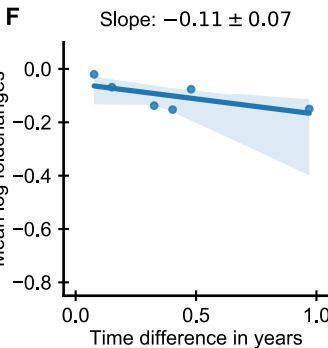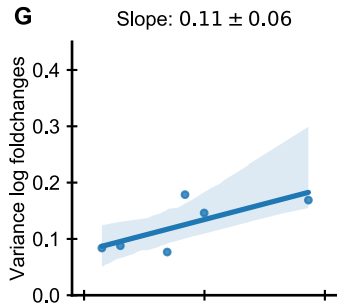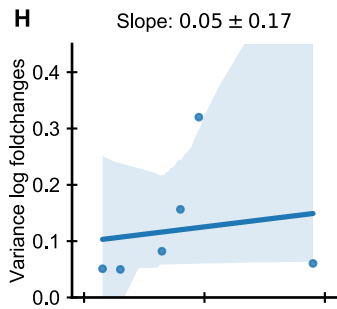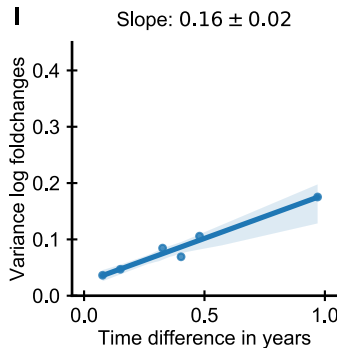

Supplement: supp [file elife-61639-supp-v1.zip]

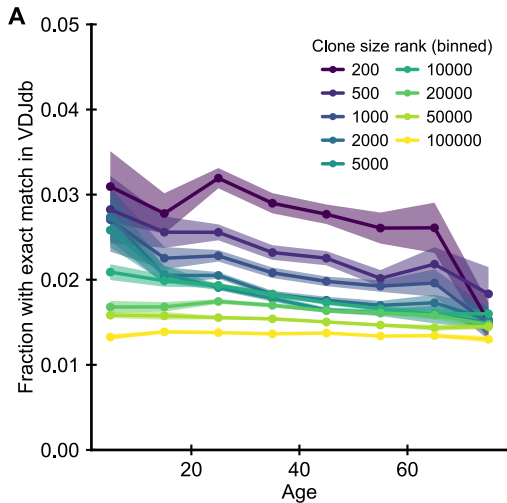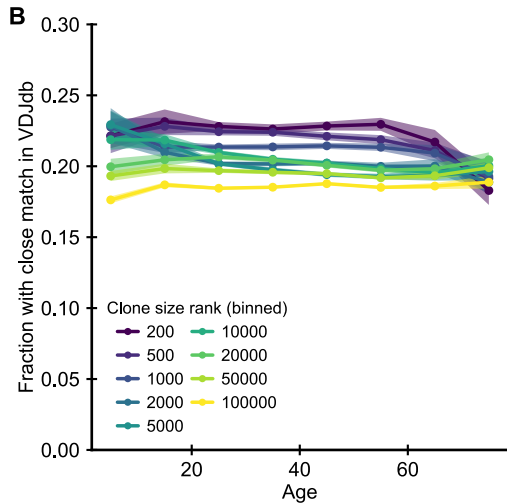

Supplement: supp [file elife-61639-supp-v1.zip]

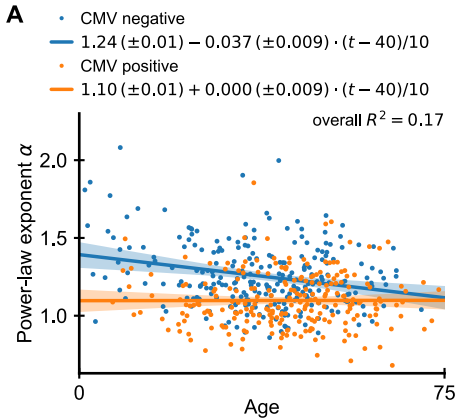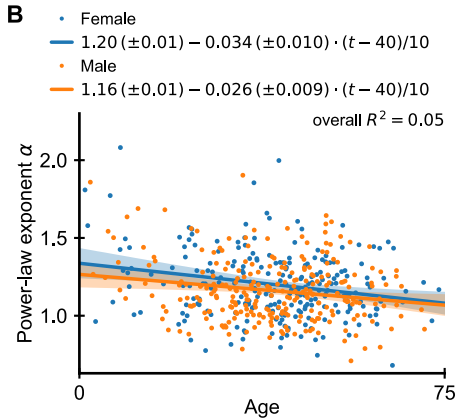

Supplement: supp [file elife-61639-supp-v1.zip]

# Britanova cohort

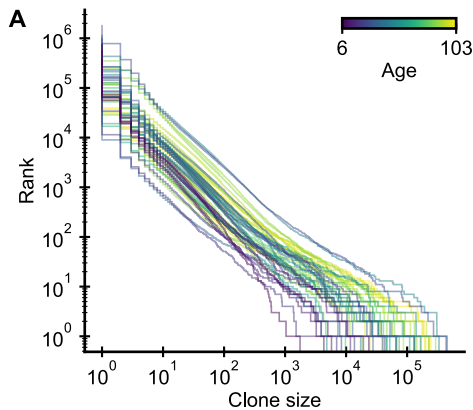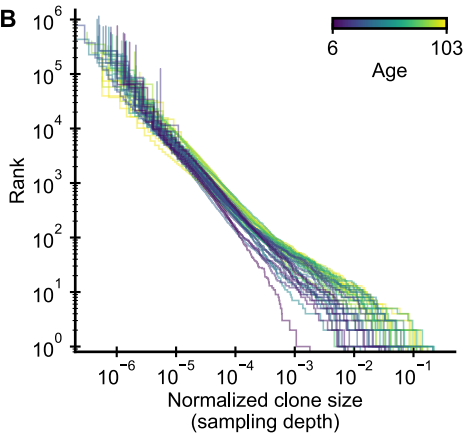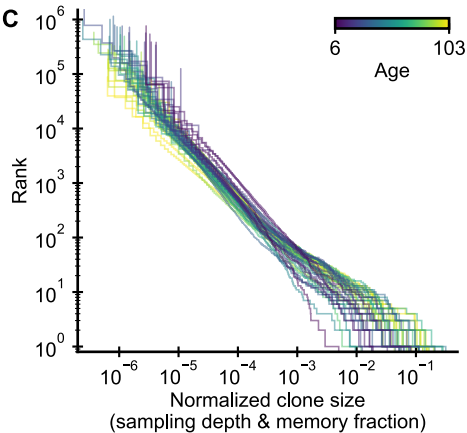

# Emerson cohort

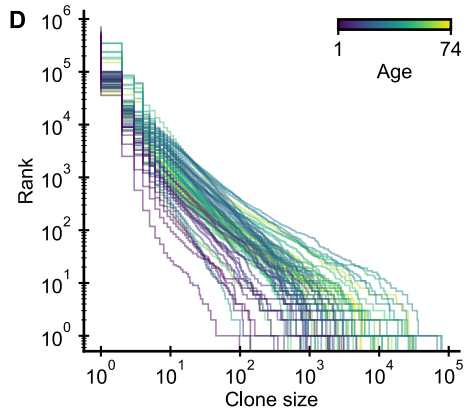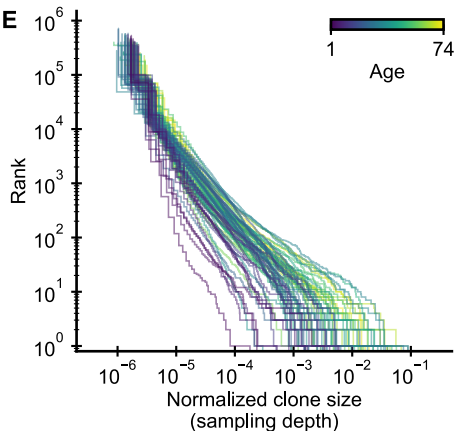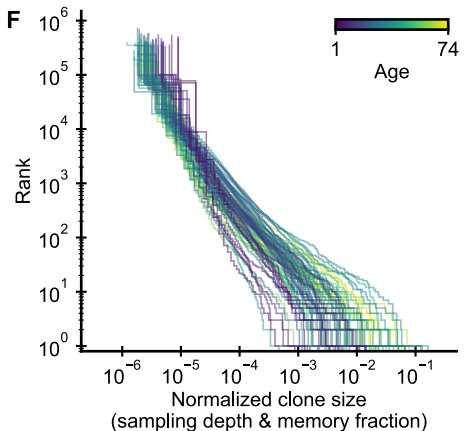

Supplement: supp [file elife-61639-supp-v1.zip]

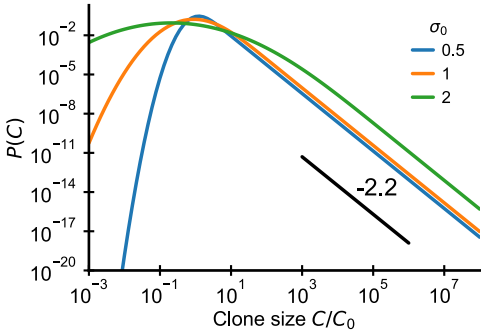

Supplement: supp [file elife-61639-supp-v1.zip]

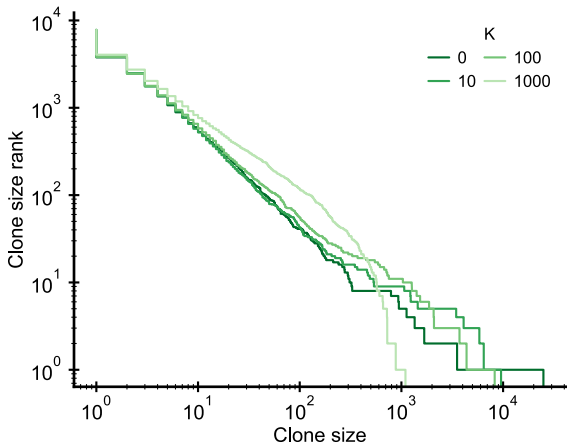

Supplement: supp [file elife-61639-supp-v1.zip]

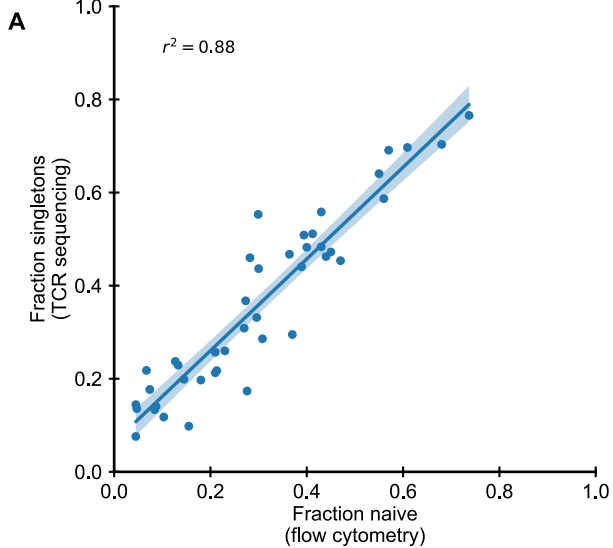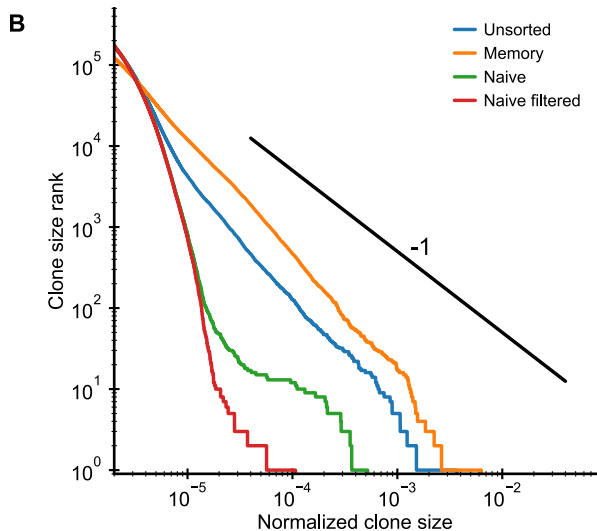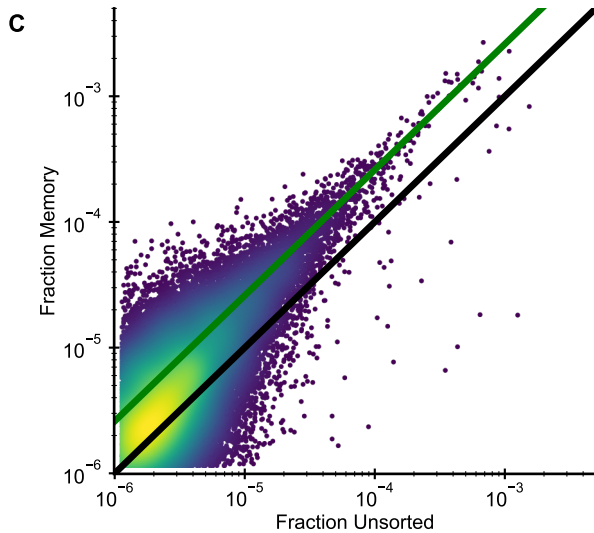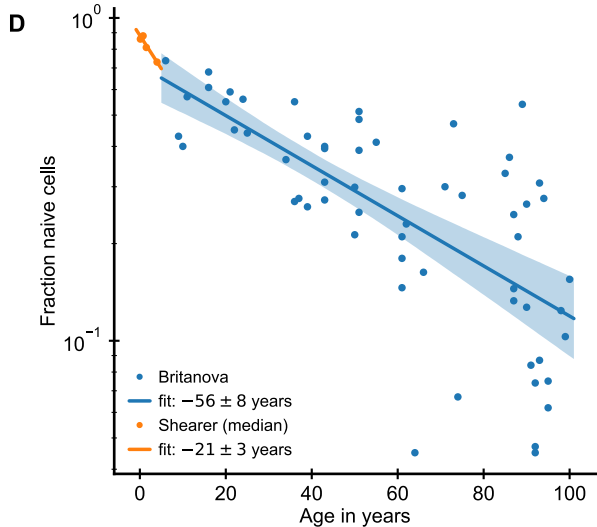

Supplement: supp [file elife-61639-supp-v1.zip]

Britanova cohort (N=71)

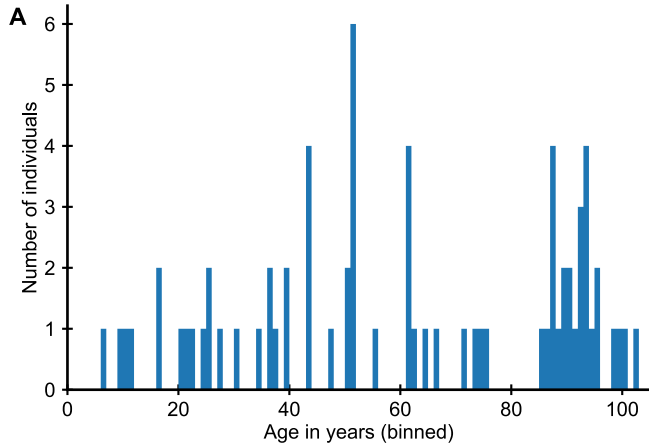

Emerson cohort (N=621)

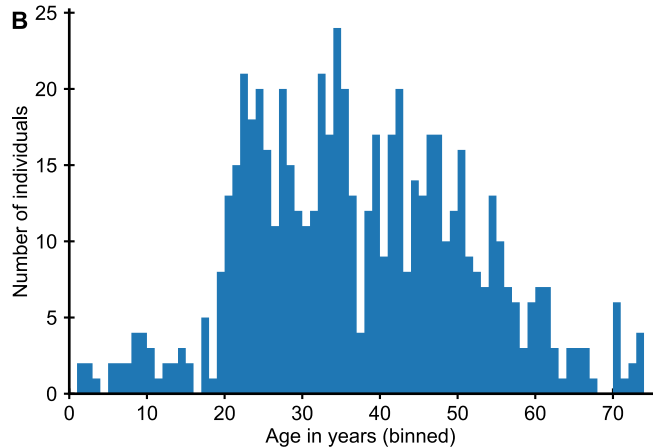

Supplement: supp [file elife-61639-supp-v1.zip]

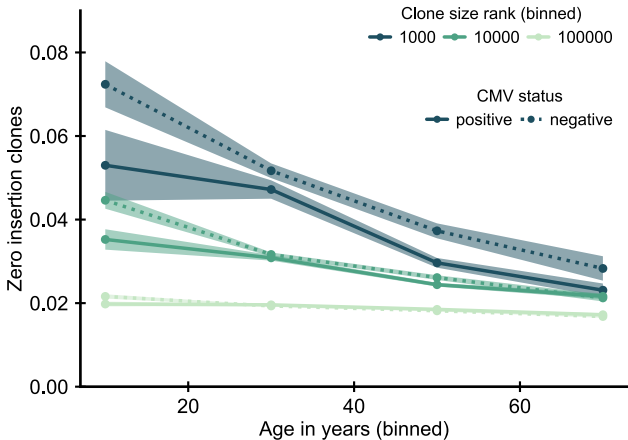

Supplement: supp [file elife-61639-supp-v1.zip]

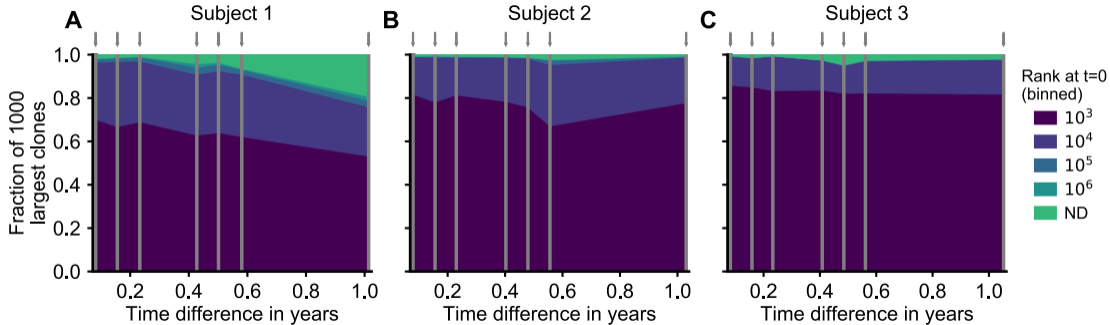

Supplement: supp [file elife-61639-supp-v1.zip]

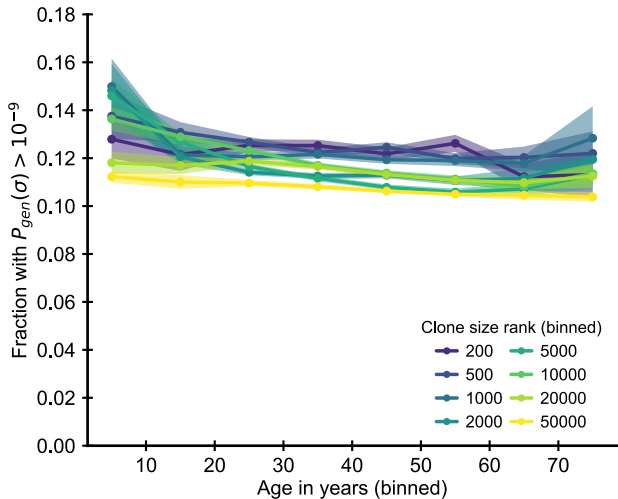

Supplement: supp [file elife-61639-supp-v1.zip]

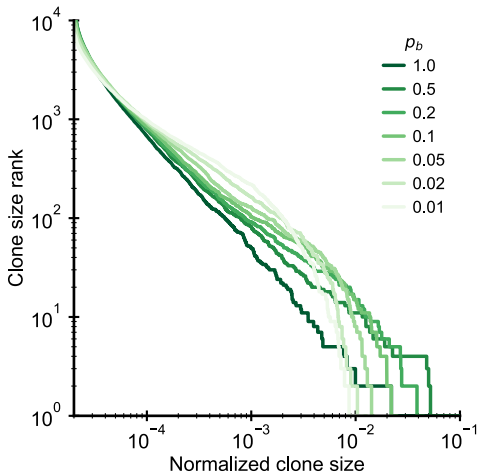

Supplement: supp [file elife-61639-supp-v1.zip]

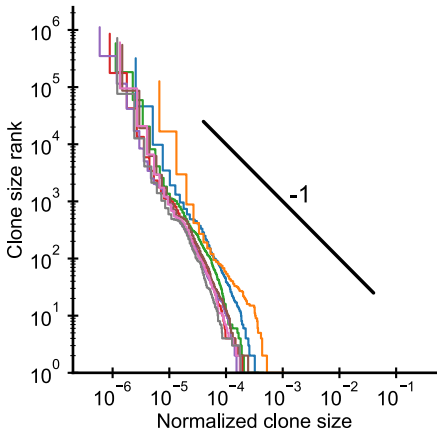

Supplement: supp [file elife-61639-supp-v1.zip]
